# Supplementary material for: Toxico-metabolomics study of a deep eutectic solvent comprising choline chloride and urea suggests in vivo toxicity involving oxidative stress and ammonia stress
Source: Royal Society of Chemistry journal article supplement (doi:10.1039/d0gc03927f), 2021-01-01

1

## Supplementary Information

2 **Toxico-metabolomics study of a deep eutectic solvent comprising choline**  
3 **chloride and urea suggests in vivo toxicity involving oxidative stress and**  
4 **ammonia stress**

5

6 Dasom Jung, Jae Back Jung, Seulgi Kang, Ke Li, Inseon Hwang, Ji Hoon Jeong, Hyung Sik Kim,  
7 Jeongmi Lee \*

8

9 School of Pharmacy, Sungkyunkwan University, Suwon, Gyeonggi 16419, Republic of Korea

10

11 \*Corresponding author: [jlee0610@skku.edu](mailto:jlee0610@skku.edu). Tel.: +82-31-290-7784. Fax: +82-31-292-8800.

12

13 **S1. Chemicals and reagents**

14 Chemicals and reagents used in this study are listed in Table S1, where chemical structures are provided for DES components.

15

16 **Table S1.** Chemicals and reagents used in the present study.

| Name (% purity)                       | Source                                | Note                                                                                                  |
|---------------------------------------|---------------------------------------|-------------------------------------------------------------------------------------------------------|
| Choline chloride (ChCl; $\geq 98\%$ ) | Sigma-Aldrich<br>(St. Louis, MO, USA) | DES components<br>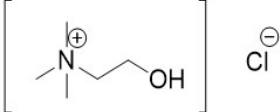 |
| Urea ( $\geq 98\%$ )                  |                                       |                    |
| Lactic acid ( $\geq 98\%$ )           |                                       |                    |
| Malic acid ( $\geq 98\%$ )            |                                       |                   |
| Glycerol ( $\geq 99.5\%$ )            |                                       |                  |

Xylitol ( $\geq 99\%$ )

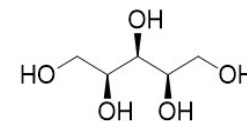

Sorbitol ( $\geq 99.5\%$ )

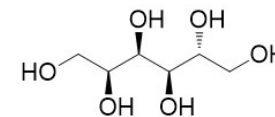

Glucose ( $\geq 99.5\%$ )

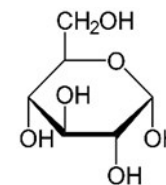

Fructose ( $\geq 99\%$ )

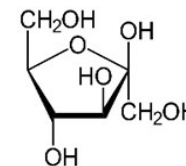

---

DL-alanine-d<sub>4</sub> ( $\geq 99\%$ )

Sigma-Aldrich

Internal standards

Stearic acid-d<sub>35</sub> ( $\geq 99\%$ )

Ribitol ( $\geq 99\%$ )

4-Chloro-DL-phenylalanine

Chlorpropamide ( $\geq 97\%$ )

---

Methoxyamine hydrochloride ( $\geq 98\%$ )

Sigma-Aldrich

Derivatization agents

*N,O*-Bis(trimethylsilyl)trifluoroacetamide with

|                                                            |                                                 |                        |
|------------------------------------------------------------|-------------------------------------------------|------------------------|
| trimethylchlorosilane (BSTFA + TMCS, 99:1)                 |                                                 |                        |
| Chloroform ( $\geq 99.9\%$ )                               | Sigma-Aldrich                                   |                        |
| Acetic acid ( $\geq 99.7\%$ )                              |                                                 |                        |
| Formic acid ( $> 99\%$ )                                   | Thermo-Fisher Scientific<br>(Rockford, IL, USA) |                        |
| Methanol                                                   | J.T. Baker                                      | HPLC-grade             |
| Acetonitrile                                               | (Center Valley, PA, USA)                        |                        |
| Water                                                      |                                                 |                        |
| 0.25% trypsin-EDTA (TE)                                    | Thermo-Fisher Scientific                        | Cell culture           |
| Fetal bovine serum (FBS)                                   |                                                 |                        |
| Dulbecco's Modified Eagle's Medium (DMEM)                  | HyClone Laboratories Inc.                       | HepG2 culture medium   |
| Roswell Park Memorial Institute 1640 Medium<br>(RPMI-1640) | (Logan, UT, USA)                                | HEK293T culture medium |
| Dimethyl sulfoxide (DMSO, $>99\%$ )                        | Samchun<br>(Pyeongtaek, Korea)                  | Cytotoxicity assay     |
| Thiazolyl blue tetrazolium bromide (MTT)                   | Sigma-Aldrich                                   |                        |

---

|                                                                |                      |                        |
|----------------------------------------------------------------|----------------------|------------------------|
| ab65354 (Superoxide dismutase assay)                           | Abcam                | Oxidative stress assay |
| ab83464 (Catalase assay)                                       | (Cambridge, MA, USA) |                        |
| ab118970 (Malondialdehyde assay)                               |                      |                        |
| ab205811 (Ratio of glutathione to glutathione disulfide assay) |                      |                        |

---

|                        |               |               |
|------------------------|---------------|---------------|
| AA0100 (Ammonia assay) | Sigma-Aldrich | Ammonia assay |
|------------------------|---------------|---------------|

---

17

18

19

20 **S2. Cytotoxicity assay procedures and results**

21 CL (1:1), CL (1:1) (aq), CM (1:1), CM (1:1) (aq), lactic acid, and malic acid were tested at 100, 500, 1,000, 2,500, 5,000, 8,000, and 10,000  $\mu\text{g mL}^{-1}$ . The  
22 other species were tested at 1,000, 2,000, 8,000, 10,000, 20,000, 40,000, and 80,000  $\mu\text{g mL}^{-1}$ . The tested concentrations in mM are listed in Table S2. The  
23 resulting  $\text{IC}_{50}$  values are listed in Tables S3 and S4 for HepG2 and HEK293T, respectively.

24

25

26 **Table S2.** Tested concentrations of DESs and associated species to determine IC<sub>50</sub> values.

| Testing species            | Tested concentration  |       |       |       |        |        |        |        |
|----------------------------|-----------------------|-------|-------|-------|--------|--------|--------|--------|
|                            | $\mu\text{g mL}^{-1}$ | 100   | 500   | 1,000 | 2,500  | 5,000  | 8,000  | 10,000 |
| CL (1:1) / CL (1:1) (aq)   | mM                    | 0.44  | 2.18  | 4.35  | 10.9   | 21.8   | 34.8   | 43.5   |
| CM (1:1) / CM (1:1) (aq)   |                       | 0.37  | 1.83  | 3.65  | 9.13   | 18.3   | 29.2   | 36.5   |
| Lactic acid                |                       | 1.11  | 5.55  | 11.1  | 27.8   | 55.5   | 88.8   | 111    |
| Malic acid                 |                       | 0.75  | 3.73  | 7.46  | 18.6   | 37.3   | 59.7   | 74.6   |
|                            | $\mu\text{g mL}^{-1}$ | 1,000 | 2,000 | 8,000 | 10,000 | 20,000 | 40,000 | 80,000 |
| CG (1:2) / CG (1:2) (aq)   | mM                    | 3.09  | 6.18  | 24.7  | 31.0   | 61.8   | 124    | 247    |
| CX (1:1) / CX (1:1) (aq)   |                       | 3.43  | 6.85  | 27.4  | 34.3   | 68.5   | 137    | 274    |
| CS (1:1) / CS (1:1) (aq)   |                       | 3.11  | 6.22  | 24.9  | 31.1   | 62.2   | 124    | 249    |
| CGL (5:2) / CGL (5:2) (aq) |                       | 0.87  | 1.74  | 6.97  | 8.71   | 17.4   | 34.8   | 69.7   |
| CF (5:2) / CF (5:2) (aq)   |                       | 0.87  | 1.74  | 6.97  | 8.71   | 17.4   | 34.8   | 69.7   |
| CU (1:2) / CU (1:2) (aq)   |                       | 3.85  | 7.7   | 30.8  | 38.5   | 77.0   | 154    | 308    |
| Glycerol                   |                       | 10.9  | 21.7  | 86.9  | 109    | 217    | 434    | 869    |
| Xylitol                    |                       | 6.57  | 13.1  | 52.6  | 65.7   | 131    | 263    | 526    |
| Sorbitol                   |                       | 5.49  | 11.0  | 43.9  | 54.9   | 110    | 220    | 439    |

|          |      |      |      |      |     |     |       |
|----------|------|------|------|------|-----|-----|-------|
| Glucose  | 5.55 | 11.1 | 44.4 | 55.5 | 111 | 222 | 444   |
| Fructose | 5.55 | 11.1 | 44.4 | 55.5 | 111 | 222 | 444   |
| Urea     | 16.6 | 33.3 | 133  | 166  | 333 | 666 | 1,331 |
| ChCl     | 7.16 | 14.3 | 57.3 | 71.6 | 143 | 287 | 573   |

---

27

28

29



30 **Table S3.** IC<sub>50</sub> values (mean ± SD; n=10) of the tested species for HepG2 cell line.

| DES component | IC <sub>50</sub> (mM) |         | DES                   | IC <sub>50</sub> (mM) |         | DES (aq)                   | IC <sub>50</sub> (mM) |          |
|---------------|-----------------------|---------|-----------------------|-----------------------|---------|----------------------------|-----------------------|----------|
| ChCl          | 43.5                  | (± 6.1) |                       |                       |         |                            |                       |          |
| Lactic acid   | 20.1                  | (± 1.9) | CL (1:1)              | 15.2                  | (± 1.3) | CL (1:1) (aq)              | 15.0                  | (± 0.9)  |
| Malic acid    | 11.2                  | (± 1.5) | CM (1:1)              | 8.8                   | (± 1.5) | CM (1:1) (aq)              | 9.5                   | (± 0.3)  |
| Glycerol      | > 869                 |         | CG (1:2)              | 33.3                  | (± 8.3) | CG (1:2) (aq)              | 33.6                  | (± 7.1)  |
| Xylitol       | > 526                 |         | CX (1:1) <sup>a</sup> | 19.5                  | (± 5.8) | CX (1:1) (aq) <sup>a</sup> | 69.4                  | (± 18.3) |
| Sorbitol      | 243                   | (± 59)  | CS (1:1) <sup>b</sup> | 18.0                  | (± 8.3) | CS (1:1) (aq) <sup>b</sup> | 54.8                  | (± 10.8) |
| Glucose       | 293                   | (± 106) | CGL (5:2)             | 9.1                   | (± 4.0) | CGL (5:2) (aq)             | 9.4                   | (± 1.1)  |
| Fructose      | 247                   | (± 19)  | CF (5:2) <sup>c</sup> | 5.1                   | (± 2.1) | CF (5:2) (aq) <sup>c</sup> | 10.9                  | (± 5.9)  |
| Urea          | 419                   | (± 41)  | CU (1:2) <sup>d</sup> | 28.4                  | (± 7.7) | CU (1:2) (aq) <sup>d</sup> | 49.0                  | (± 7.4)  |

31 <sup>a</sup>  $p = 0.0002$  between DES and DES (aq).

32 <sup>b</sup>  $p = 0.0003$  between DES and DES (aq).

33 <sup>c</sup>  $p = 0.0204$  between DES and DES (aq).

34 <sup>d</sup>  $p = 0.0186$  between DES and DES (aq).

35

36

37 **Table S4.** IC<sub>50</sub> values (mean ± SD; n=10) of the tested species for HEK293T cell line.

| DES component | IC <sub>50</sub> (mM) |         | DES                   | IC <sub>50</sub> (mM) |          | DES (aq)                   | IC <sub>50</sub> (mM) |         |
|---------------|-----------------------|---------|-----------------------|-----------------------|----------|----------------------------|-----------------------|---------|
| ChCl          | 89.7                  | (±26.9) |                       |                       |          |                            |                       |         |
| Lactic acid   | 14.0                  | (±0.5)  | CL (1:1) <sup>a</sup> | 13.0                  | (± 0.6)  | CL (1:1) (aq) <sup>a</sup> | 20.6                  | (±8.1)  |
| Malic acid    | 65.0                  | (±11.8) | CM (1:1) <sup>b</sup> | 38.7                  | (± 12.2) | CM (1:1) (aq) <sup>b</sup> | 16.4                  | (±0.4)  |
| Glycerol      | 777                   | (±57.5) | CG (1:2) <sup>c</sup> | 74.5                  | (± 20.7) | CG (1:2) (aq) <sup>c</sup> | 128                   | (±47)   |
| Xylitol       | > 526                 |         | CX (1:1)              | 160                   | (± 66.6) | CX (1:1) (aq)              | 107                   | (±46)   |
| Sorbitol      | 371                   | (±61.5) | CS (1:1)              | 65.8                  | (± 17.6) | CS (1:1) (aq)              | 87.5                  | (±26.8) |
| Glucose       | 277                   | (±33.4) | CGL (5:2)             | 21.5                  | (± 8.7)  | CGL (5:2) (aq)             | 28.1                  | (±11.9) |
| Fructose      | 303                   | (±22.8) | CF (5:2)              | 19.0                  | (± 9.1)  | CF (5:2) (aq)              | 33.4                  | (±17.7) |
| Urea          | 541                   | (±53.0) | CU (1:2)              | 101                   | (± 31.1) | CU (1:2) (aq)              | 100                   | (±32)   |

38 <sup>a</sup>  $p = 0.0194$  between DES and DES (aq).

39 <sup>b</sup>  $p = 0.0002$  between DES and DES (aq).

40 <sup>c</sup>  $p = 0.0281$  between DES and DES (aq).

41

42

43

44 **S3. Detailed information on doses for in vivo study**

45 The density of CU (1:2) is  $1.19 \text{ g cm}^{-3}$ . Two-fold dilution of CU (1:2) with water results in 50% v/v CU (1:2). The % v/v concentration of this solution  
46 can be converted to % w/w concentration by the following calculation:

47 
$$(50 \times 10^{-3} \text{ mL} \times 1.19 \text{ g mL}^{-1}) \div (50 \times 10^{-3} \text{ mL} \times 1.19 \text{ g mL}^{-1} + 50 \times 10^{-3} \text{ g}) \times 100 = 54.3\% \text{ w/w CU (1:2) or } 45.7\% \text{ w/w water}$$

48 In in vivo study, CU (1:2) was administered using a water-diluted formulation (50% v/v CU). The administration dose of CU (1:2) equivalent to  $1.5 \text{ g kg}^{-1}$   
49 was calculated using the average mouse weight of 28 g (see the footnote of Table S5 for calculation). Detailed dose information in the five groups is  
50 provided in Table S5.

51

52

53 **Table S5.** Doses and volumes of the testing species for administration in *in vivo* study.

| Group     | Treatment     | Amount administered to each mouse |                       |                    | Volume of administration                                                            |
|-----------|---------------|-----------------------------------|-----------------------|--------------------|-------------------------------------------------------------------------------------|
|           |               | ChCl                              | Urea                  | Total              |                                                                                     |
| Group i   | Saline        | - <sup>a</sup>                    | -                     | -                  | 70.4 μL of saline                                                                   |
| Group ii  | CU (1:2)      | 22.6 mg (=0.162 mmol)             | 19.4 mg (=0.323 mmol) | 42 mg <sup>b</sup> | 70.4 μL of 50% v/v CU (1:2) <sup>c</sup> (CU (1:2):water, 1:1 v/v)                  |
| Group iii | CU (1:2) (aq) | 22.6 mg (=0.162 mmol)             | 19.4 mg (=0.323 mmol) | 42 mg              | 70.4 μL of aqueous solution containing 42 mg of ChCl and urea in total <sup>d</sup> |
| Group iv  | ChCl          | 22.6 mg (=0.162 mmol)             | -                     | 22.6 mg            | 70.4 μL of aqueous solution containing 22.6 mg of ChCl <sup>d</sup>                 |
| Group v   | Urea          | -                                 | 19.4 mg (=0.323 mmol) | 19.4 mg            | 70.4 μL of aqueous solution containing 19.4 mg of urea <sup>d</sup>                 |

54 <sup>a</sup> None.

55 <sup>b</sup>  $(42 \text{ mg} \times 10^{-3} \text{ mg g}^{-1} \text{ CU (1:2)}) \div (28 \text{ g} \times 10^{-3} \text{ g kg}^{-1} \text{ mouse weight}) = 1.5 \text{ g kg}^{-1}$ .

56 <sup>c</sup> Equals to 54.3% w/w CU or 45.7% w/w water.

57 <sup>d</sup> No heat was applied to prepare the solution.

58

59

60

61 **S4. Identified differential metabolites and heat-map presentation**

62 The identified differential metabolites in serum, kidney, and liver are listed in Tables S6, S7, and S8, respectively. In the heat-map presentation of group ii  
63 (Figure 4a), eight out of 16 biological replicates were selected randomly and shown in the map only to have the same number of samples as the other  
64 groups. The pathway analysis results presented in Figures 4b-4d are listed in Table S9.

65

66

67 **Table S6.** A list of differential metabolites identified in serum.

| Metabolite                   | $t_R$ (min) <sup>a</sup> | Group ii (treated with CU (1:2)) vs. Group i (treated with saline) |             |                     |
|------------------------------|--------------------------|--------------------------------------------------------------------|-------------|---------------------|
|                              |                          | VIP score                                                          | Fold change | t-test ( <i>p</i> ) |
| Pyruvate <sup>b</sup>        | 5.90                     | 1.66                                                               | 1.32        | 0.003               |
| L-Lactic acid <sup>b</sup>   | 6.10                     | 1.11                                                               | 0.68        | 0.023               |
| L-Alanine <sup>b</sup>       | 6.81                     | 3.59                                                               | 0.62        | 0.002               |
| ? <sup>d</sup>               | 7.14                     | 1.72                                                               | 0.94        | 0.015               |
| Oxalic acid <sup>b</sup>     | 7.45                     | 4.57                                                               | 0.75        | < 0.0001            |
| L-Valine <sup>b</sup>        | 8.66                     | 5.32                                                               | 0.6         | < 0.0001            |
| Urea <sup>b</sup>            | 8.99                     | 6.08                                                               | 0.83        | < 0.0001            |
| L-Leucine <sup>b</sup>       | 9.52                     | 5.22                                                               | 0.52        | < 0.0001            |
| ?                            | 9.58                     | 3.07                                                               | 1.59        | 0.004               |
| ?                            | 9.67                     | 1.80                                                               | 1.25        | 0.005               |
| L-Isoleucine <sup>b</sup>    | 9.84                     | 2.30                                                               | 0.31        | < 0.0001            |
| L-Proline <sup>b</sup>       | 9.88                     | 4.94                                                               | 0.55        | < 0.0001            |
| L-Serine <sup>b</sup>        | 10.82                    | 2.92                                                               | 0.67        | < 0.0001            |
| L-Threonine <sup>b</sup>     | 11.2                     | 3.00                                                               | 0.64        | < 0.0001            |
| ?                            | 12.87                    | 1.86                                                               | 0.64        | < 0.0001            |
| Ornithine <sup>b</sup>       | 14.03                    | 1.74                                                               | 0.71        | 0.002               |
| Phenylalanine <sup>b</sup>   | 14.18                    | 2.04                                                               | 0.69        | < 0.0001            |
| Taurine <sup>b</sup>         | 14.69                    | 1.02                                                               | 0.6         | < 0.0001            |
| L-Glutamic acid <sup>b</sup> | 15.81                    | 2.92                                                               | 0.78        | 0.000               |
| ?                            | 16.01                    | 1.32                                                               | 0.64        | 0.015               |

|                            |       |      |      |          |
|----------------------------|-------|------|------|----------|
| ?                          | 16.32 | 2.78 | 0.57 | < 0.0001 |
| Citric acid <sup>b</sup>   | 16.39 | 1.09 | 0.75 | 0.010    |
| ?                          | 16.74 | 1.42 | 0.86 | 0.001    |
| L-Tyrosine <sup>b</sup>    | 17.56 | 1.09 | 0.68 | < 0.0001 |
| ?                          | 18.06 | 2.40 | 0.78 | 0.034    |
| Palmitic acid <sup>b</sup> | 18.41 | 1.98 | 1.39 | 0.020    |
| ?                          | 18.9  | 1.56 | 0.17 | < 0.0001 |
| Myo-inositol <sup>b</sup>  | 19.17 | 1.59 | 0.86 | 0.004    |
| ?                          | 19.98 | 1.84 | 2.42 | 0.008    |
| Stearic acid <sup>b</sup>  | 20.20 | 3.36 | 0.76 | < 0.0001 |
| Cholesterol <sup>c</sup>   | 29.96 | 2.09 | 1.15 | 0.024    |

---

68 <sup>a</sup> Retention time in the analysis by GC-MS.

69 <sup>b</sup> Identified using commercially available standards.

70 <sup>c</sup> Identified by comparing with the MS library.

71 <sup>d</sup> Not identified.

72

73

74 **Table S7.** A list of differential metabolites identified in kidney.

| Metabolites                  | $t_R$ (min)        | Group ii (treated with CU (1:2)) vs. Group i (treated with saline) |             |                |
|------------------------------|--------------------|--------------------------------------------------------------------|-------------|----------------|
|                              |                    | VIP score                                                          | Fold change | t-test ( $p$ ) |
| L-Lactic acid <sup>c</sup>   | 6.17 <sup>a</sup>  | 21.32                                                              | 1.54        | < 0.0001       |
| Oxalic acid <sup>c</sup>     | 7.84 <sup>a</sup>  | 1.28                                                               | 1.15        | 0.009          |
| L-Leucine <sup>c</sup>       | 10.91 <sup>a</sup> | 1.11                                                               | 1.52        | < 0.0001       |
| ? <sup>e</sup>               | 11.04 <sup>a</sup> | 2.19                                                               | 1.19        | 0.029          |
| L-Proline <sup>c</sup>       | 11.46 <sup>a</sup> | 1.08                                                               | 1.55        | < 0.0001       |
| Glycine <sup>c</sup>         | 11.76 <sup>a</sup> | 1.47                                                               | 2.01        | 0.025          |
| L-Serine <sup>c</sup>        | 13.14 <sup>a</sup> | 22.20                                                              | 1.49        | < 0.0001       |
| Aspartic acid <sup>c</sup>   | 16.98 <sup>a</sup> | 22.37                                                              | 1.41        | < 0.0001       |
| Cysteine <sup>c</sup>        | 17.74 <sup>a</sup> | 21.97                                                              | 1.38        | < 0.0001       |
| L-Glutamic acid <sup>c</sup> | 19.23 <sup>a</sup> | 1.09                                                               | 1.28        | 0.001          |
| Taurine <sup>c</sup>         | 20.24 <sup>a</sup> | 1.08                                                               | 0.67        | 0.003          |
| Asparagine <sup>c</sup>      | 20.37 <sup>a</sup> | 15.86                                                              | 1.63        | 0.007          |
| ?                            | 20.87 <sup>a</sup> | 1.23                                                               | 1.56        | < 0.0001       |
| Phosphoric acid <sup>d</sup> | 22.57 <sup>a</sup> | 1.14                                                               | 0.80        | 0.002          |
| Hypoxanthine <sup>d</sup>    | 23.07 <sup>a</sup> | 1.11                                                               | 1.42        | < 0.0001       |
| D-Glucose <sup>c</sup>       | 25.49 <sup>a</sup> | 1.44                                                               | 1.53        | 0.034          |
| Cholesterol <sup>d</sup>     | 37.21 <sup>a</sup> | 1.09                                                               | 1.15        | 0.037          |
| ?                            | 1.08 <sup>b</sup>  | 1.42                                                               | 1.69        | 0.002          |
| Nicotinamide <sup>c</sup>    | 1.13 <sup>b</sup>  | 5.44                                                               | 1.27        | 0.030          |
| Allopurinol <sup>d</sup>     | 1.21 <sup>b</sup>  | 6.81                                                               | 1.30        | 0.050          |



|                               |                   |      |      |          |
|-------------------------------|-------------------|------|------|----------|
| Inosine <sup>c</sup>          | 1.25 <sup>b</sup> | 1.76 | 1.28 | 0.020    |
| L-Leucine <sup>c</sup>        | 1.32 <sup>b</sup> | 5.31 | 1.40 | 0.001    |
| ?                             | 1.48 <sup>b</sup> | 3.13 | 1.25 | 0.020    |
| ?                             | 1.48 <sup>b</sup> | 3.09 | 1.89 | < 0.0001 |
| Tryptophan <sup>c</sup>       | 1.67 <sup>b</sup> | 1.89 | 1.40 | 0.001    |
| ?                             | 1.8 <sup>b</sup>  | 2.43 | 2.16 | < 0.0001 |
| ?                             | 2.34 <sup>b</sup> | 1.61 | 1.63 | 0.001    |
| LysoPC(0:0/20:4) <sup>d</sup> | 4.84 <sup>b</sup> | 3.64 | 1.32 | 0.030    |
| LysoPC(16:0) <sup>d</sup>     | 5.18 <sup>b</sup> | 4.66 | 1.50 | 0.020    |
| LysoPC(18:1) <sup>d</sup>     | 5.77 <sup>b</sup> | 7.13 | 1.46 | 0.010    |
| ?                             | 6.22 <sup>b</sup> | 1.39 | 5.46 | 0.004    |
| ?                             | 6.29 <sup>b</sup> | 3.16 | 1.65 | 0.010    |
| LysoPC(0:0/18:0) <sup>d</sup> | 6.72 <sup>b</sup> | 1.03 | 6.35 | < 0.0001 |
| ?                             | 6.83 <sup>b</sup> | 1.28 | 2.28 | 0.02     |

75 <sup>a</sup> Retention time in the analysis by GC-MS.

76 <sup>b</sup> Retention time in the analysis by LC-MS/MS.

77 <sup>c</sup> Identified using commercially available standards.

78 <sup>d</sup> Identified by comparing with the MS library.

79 <sup>e</sup> Not identified.

80

81

82 **Table S8.** A list of differential metabolites identified in liver.

| Metabolite                    | $t_R$ (min)        | Group ii (treated with CU (1:2)) vs. Group i (treated with saline) |             |                |
|-------------------------------|--------------------|--------------------------------------------------------------------|-------------|----------------|
|                               |                    | VIP score                                                          | Fold change | t-test ( $p$ ) |
| ? <sup>e</sup>                | 7.43 <sup>a</sup>  | 1.61                                                               | 0.55        | 0.014          |
| Phosphoric acid <sup>d</sup>  | 11.01 <sup>a</sup> | 8.66                                                               | 0.90        | 0.000          |
| L-Proline <sup>c</sup>        | 11.45 <sup>a</sup> | 1.38                                                               | 0.70        | 0.001          |
| Aspartic acid <sup>c</sup>    | 16.97 <sup>a</sup> | 1.61                                                               | 0.72        | 0.000          |
| Threonic acid <sup>c</sup>    | 18.12 <sup>a</sup> | 4.1                                                                | 0.53        | 0.021          |
| Arabinose <sup>d</sup>        | 20.85 <sup>a</sup> | 2.41                                                               | 1.54        | 0.020          |
| Glutamine <sup>c</sup>        | 22.53 <sup>a</sup> | 2.62                                                               | 0.75        | 0.005          |
| Ornithine <sup>c</sup>        | 23.49 <sup>a</sup> | 1.17                                                               | 0.77        | 0.001          |
| Gluconic acid <sup>d</sup>    | 26.61 <sup>a</sup> | 4.74                                                               | 0.54        | 0.004          |
| Palmitic acid <sup>c</sup>    | 27.25 <sup>a</sup> | 1.08                                                               | 0.91        | 0.039          |
| Stearic acid <sup>c</sup>     | 29.67 <sup>a</sup> | 2.29                                                               | 0.87        | 0.007          |
| Inosine <sup>c</sup>          | 32.97 <sup>a</sup> | 5.22                                                               | 2.81        | 0.015          |
| Adenosine <sup>c</sup>        | 36.63 <sup>a</sup> | 2.79                                                               | 0.39        | 0.000          |
| Cholesterol <sup>d</sup>      | 37.19 <sup>a</sup> | 2.69                                                               | 0.92        | 0.038          |
| Taurocholic acid <sup>d</sup> | 2.26 <sup>b</sup>  | 1.69                                                               | 5.08        | 0.020          |
| LysoPC(0:0/18:0) <sup>d</sup> | 6.76 <sup>b</sup>  | 2.52                                                               | 3.37        | 0.040          |

83 <sup>a</sup> Retention time in the analysis by GC-MS.

84 <sup>b</sup> Retention time in the analysis by LC-MS/MS.

85 <sup>c</sup> Identified using commercially available standards.

86 <sup>d</sup> Identified by comparing with the MS library.

87 <sup>e</sup> Not identified.

88

89

90 **Table S9.** Summary of the pathway analysis results.

| Pathway name                                        | Total compounds | Hits | $-\log(p)$ | Impact | Sample |
|-----------------------------------------------------|-----------------|------|------------|--------|--------|
| Phenylalanine, tyrosine and tryptophan biosynthesis | 4               | 2    | 16.19      | 1.00   | Serum  |
| Phenylalanine metabolism                            | 12              | 2    | 16.19      | 0.36   |        |
| Aminoacyl-tRNA biosynthesis                         | 48              | 10   | 14.81      | 0.17   |        |
| Glycine, serine and threonine metabolism            | 34              | 3    | 14.49      | 0.23   |        |
| Taurine and hypotaurine metabolism                  | 8               | 1    | 13.59      | 0.43   |        |
| Arginine and proline metabolism                     | 38              | 4    | 13.49      | 0.27   |        |
| Arginine biosynthesis                               | 14              | 3    | 10.25      | 0.18   |        |
| D-Glutamine and D-glutamate metabolism              | 6               | 1    | 8.50       | 0.50   |        |
| Pyruvate metabolism                                 | 22              | 2    | 6.49       | 0.29   |        |
| Cysteine and methionine metabolism                  | 33              | 2    | 6.39       | 0.12   | Kidney |
| Arginine and proline metabolism                     | 38              | 2    | 6.17       | 0.16   |        |
| Valine, leucine and isoleucine degradation          | 40              | 1    | 5.55       | 0.00   |        |
| Valine, leucine and isoleucine biosynthesis         | 8               | 1    | 5.55       | 0.00   |        |
| Purine metabolism                                   | 66              | 1    | 5.51       | 0.02   |        |
| Sphingolipid metabolism                             | 21              | 1    | 5.13       | 0.00   |        |
| Pantothenate and CoA biosynthesis                   | 19              | 2    | 4.87       | 0.00   |        |
| Pyruvate metabolism                                 | 22              | 1    | 4.70       | 0.08   |        |
| Taurine and hypotaurine metabolism                  | 8               | 1    | 4.58       | 0.00   |        |
| Alanine, aspartate and glutamate metabolism         | 28              | 3    | 3.97       | 0.42   |        |
| Arginine biosynthesis                               | 14              | 2    | 3.97       | 0.12   |        |

|                                             |    |   |      |      |       |
|---------------------------------------------|----|---|------|------|-------|
| Tryptophan metabolism                       | 41 | 1 | 3.26 | 0.14 |       |
| D-Glutamine and D-glutamate metabolism      | 6  | 1 | 3.61 | 0.50 |       |
| Aminoacyl-tRNA biosynthesis                 | 48 | 9 | 2.39 | 0.17 |       |
| Glycine, serine and threonine metabolism    | 34 | 3 | 1.77 | 0.48 |       |
| Arginine and proline metabolism             | 38 | 2 | 3.36 | 0.19 | Liver |
| Aminoacyl-tRNA biosynthesis                 | 48 | 3 | 3.05 | 0.00 |       |
| Glutathione metabolism                      | 28 | 1 | 2.88 | 0.00 |       |
| Arginine biosynthesis                       | 14 | 3 | 2.80 | 0.06 |       |
| Alanine, aspartate and glutamate metabolism | 28 | 2 | 2.73 | 0.34 |       |
| Purine metabolism                           | 66 | 3 | 2.62 | 0.00 |       |
| Pentose phosphate pathway                   | 22 | 1 | 2.51 | 0.05 |       |
| Glycerophospholipid metabolism              | 36 | 1 | 1.36 | 0.02 |       |

91

92

93

94 **S5. Biochemical assays associated with oxidative stress**

95 **S5.1. SOD assay**

96 The assay was conducted according to the manufacturer's protocol. In brief, tissue samples (10 mg) were homogenized in ice-cold 0.1 M Tris·HCl buffer  
97 (pH 7.4) containing 0.5% Triton X-100, 5 mM β-mercaptoethanol, and 0.1 mg mL<sup>-1</sup> phenylmethylsulfonylfluoride. After centrifugation at 14,680 g for 10  
98 min, the supernatant expressing total SOD activity from mitochondrial and cytosolic enzymes was transferred to a clean tube. All materials and reagents  
99 were equilibrated to room temperature and gently agitated just prior to use unless specified. Each reaction well in a 96-well plate was set-up according to  
100 Table S10. After mixing of samples and reagent solutions and incubation at 37 °C for 20 min, absorbance at 450 nm was measured. SOD activity was  
101 calculated using the following equation:

$$SOD \text{ activity (\%)} = \frac{(A_{blank1} - A_{blank3}) - (A_{sample} - A_{blank2})}{(A_{blank1} - A_{blank3})} \times 100$$

102

103

104

105 **Table S10.** SOD assay conditions.

| Component                         | Sample ( $\mu\text{L}$ ) | Blank 1 ( $\mu\text{L}$ ) | Blank 2 ( $\mu\text{L}$ ) | Blank 3 ( $\mu\text{L}$ ) |
|-----------------------------------|--------------------------|---------------------------|---------------------------|---------------------------|
| Sample solution                   | 20                       | 0                         | 20                        | 0                         |
| H <sub>2</sub> O                  | 0                        | 20                        | 0                         | 20                        |
| WST <sup>a</sup> working solution | 200                      | 200                       | 200                       | 200                       |
| Enzyme working solution           | 20                       | 20                        | 0                         | 0                         |
| Dilution buffer                   | 0                        | 0                         | 20                        | 20                        |

106 <sup>a</sup> A tetrazolium salt that produces a water-soluble formazan dye upon reduction with superoxide anion.

107

108

## 109 S5.2. CAT assay

110 The manufacturer's protocol was applied without modifications. For a standard calibration curve, a series of H<sub>2</sub>O<sub>2</sub> standard solutions (0, 20, 40, 60, 80, and  
111 100 μM using 1 mM H<sub>2</sub>O<sub>2</sub>) were prepared in assay buffer, and 90 μL of each solution was removed and mixed with 10 μL of stop solution. For tissue  
112 samples, 100 mg of liver or 50 mg of kidney were homogenized with 200 μL of assay buffer and centrifuged at 14,680 g for 10 min. The collected  
113 supernatant was stored on ice until use. The cleared lysates of liver (10 μL) and kidney (20 μL) were added to two series of wells and adjusted to a final  
114 volume to 78 μL using the assay buffer. For the high control (HC) sample series, stop solution (10 μL) was added and incubated at 25 °C for 5 min to  
115 completely inhibit the CAT activity. Both the regular and HC samples were mixed with 12 μL of 1 mM H<sub>2</sub>O<sub>2</sub>. After incubation at 25 °C for 30 min, only  
116 the regular sample was mixed with 10 μL of stop solution. Finally, 50 μL of developer mix solution, horseradish peroxidase (HRP), and peroxidase  
117 substrate (OxiRed probe) was added to all the wells and incubated at 25 °C for 10 min with protection from light. Absorbance was measured at 570 nm.  
118 Mean absorbance of the blank (containing no H<sub>2</sub>O<sub>2</sub>) was subtracted from the absorbance of all standards and samples. The corrected readings of the  
119 standard solutions were plotted against the H<sub>2</sub>O<sub>2</sub> concentrations to establish a standard calibration curve using Prism Ver. 7.0. For each sample, ΔAbs (=

120  $A_{HC} - A_{sample}$ ;  $A_{HC}$  and  $A_{sample}$  are the readings of the HC and regular samples, respectively) was obtained and applied to the H<sub>2</sub>O<sub>2</sub> calibration curve to  
121 determine the concentration of H<sub>2</sub>O<sub>2</sub> (μmol) decomposed by CAT during the 30 min reaction. CAT activity (μmol min<sup>-1</sup>mL<sup>-1</sup>) in the tested sample was  
122 calculated using the following equation:

$$123 \text{ CAT activity } (\mu\text{mol min}^{-1} \text{ mL}^{-1}) = \frac{B}{30 \times V} (\times D)$$

124 where B is the amount of H<sub>2</sub>O<sub>2</sub> in a sample well (nmol), 30 is the CAT reaction time (min), V is the pre-original sample volume added into the reaction  
125 well (mL), and D is the sample dilution factor (D = 1 in this study).



126

### 127 **S5.3. MDA assay**

128 The manufacturer's protocol was followed without any modifications. A stock solution (4.17 M) of malondialdehyde (MDA) was serially diluted with  
129 water to prepare 2 mM MDA standard solution and was used to prepare a series of MDA standard solutions (0, 20, 40, 60, 80, and 100  $\mu\text{M}$ ). For samples,  
130 10 mg of tissues were homogenized with 303  $\mu\text{L}$  of the MDA lysis buffer and centrifuged at 14,680 g for 10 min. Each vial containing 200  $\mu\text{L}$  of standard  
131 and 200  $\mu\text{L}$  of sample was mixed with 600  $\mu\text{L}$  of thiobarbituric acid (TBA) solution, resulting in the generation of MDA-TBA adduct. After incubation at  
132 95  $^{\circ}\text{C}$  for 1 h, the vial was cooled on ice-bath for 10 min. Samples became turbid, and they were filtered through a 0.2- $\mu\text{m}$  syringe filter (Whatman,  
133 Piscataway, NJ, USA) for clarity before absorbance reading. A portion of the reacted solution (200  $\mu\text{L}$ ) was transferred to a well, and its absorbance was  
134 measured at 532 nm.

135 Mean absorbance of the blank (containing no MDA) was subtracted from the absorbance of all standards and samples. The corrected readings of the  
136 standard solutions versus the MDA levels were plotted to construct a standard calibration curve of MDA. The sample absorbance was applied to the  
137 standard curve to quantify the MDA levels in each sample well. The MDA concentration in the tissue sample was calculated using the following equation:

$$138 \text{ MDA concentration (nmol mg}^{-1}\text{)} = \frac{A}{\mu\text{g}} \times 4 (\times D)$$

139 where A is the amount (nmol) of MDA in a sample calculated from the standard curve, mg is the original amount of tissue used, 4 is the correction factor  
140 for using 200  $\mu\text{L}$  of the 800  $\mu\text{L}$  reaction mixture, and D is the sample dilution factor (D = 1 in this study).

141 .

142

143 **S5.4. GSH/GSSG assay**

144 The manufacturer's protocol was followed without modifications. A series of glutathione (GSH) standard solutions were prepared using assay buffer at the  
145 final concentrations of 0, 0.1563, 0.3125, 0.625, 1.25, 2.5, 5.0, and 10  $\mu\text{M}$ . For the glutathione disulfide (GSSH) standard solutions, the final  
146 concentrations were 0, 0.0781, 0.1563, 0.3125, 0.625, 1.25, 2.5, and 5.0  $\mu\text{M}$ . A portion (20 mg) of liver or kidney was homogenized in 400  $\mu\text{L}$  of ice-cold  
147 PBS containing 0.5% NP-40 and centrifuged at 14,680 g for 10 min. The supernatant was collected and kept on ice until use. A 96-well plate was split into  
148 two panels: panel A for GSH measurement and panel B for GSSG measurement. Panel A had two replicates of a series of GSH standard solution, followed  
149 by columns of test samples in eight replicates. Likewise, the layout of panel B consisted of columns of GSSG standard solutions in duplicates, followed by  
150 columns of test samples. The wells were filled with 50  $\mu\text{L}$  of GSH standard, GSSH standard, or sample solution. GSH assay mixture (GAM) was prepared  
151 by diluting 50  $\mu\text{L}$  of 100 $\times$  stock solution of thiol green with 5 mL of assay buffer for GSH detection, while total GSH assay mixture (TGAM) was  
152 prepared by diluting 100  $\mu\text{L}$  of 25 $\times$  stock solution of GSSG probe with 2.5 mL of GAM for detection of GSH and GSSG. Finally, 50  $\mu\text{L}$  of GAM or  
153 TGAM were added to each well to make 100  $\mu\text{L}$  in total, and incubated at room temperature for 60 min. Fluorescence was monitored at Ex/Em = 490  
154 nm/520 nm.

155 Mean absorbance of the blank (containing no GSH or GSSG standard) was subtracted from the absorbance in all standard and sample readings. The  
156 corrected values were plotted against log-transformed concentrations of GSH and total GSH+GSSG to construct standard calibration curves.

157 Concentrations of GSH and total GSH+GSSG were calculated using the calibration curves, and the GSSG concentration could be estimated using the  
158 following equation:

159 
$$GSSG (\mu M) = \frac{\text{Total glutathione} - GSH}{2}$$

160 The results of SOD activity, CAT activity, GSH/GSSG, MDA assays are summarized in Table S11.

161 **Table S11.** Results (mean  $\pm$  SD) of the oxidative stress-associated assays shown in Figure 5.

| Mouse group | Superoxide dismutase (SOD) activity (%) |                                | Catalase (CAT) activity ( $\mu\text{mol min}^{-1} \text{mL}^{-1}$ ) |                                 | Ratio of glutathione to glutathione disulfide (GSH/GSSG) |                                 | Malondialdehyde (MDA) level ( $\text{nmol mg}^{-1}$ ) |                                   |
|-------------|-----------------------------------------|--------------------------------|---------------------------------------------------------------------|---------------------------------|----------------------------------------------------------|---------------------------------|-------------------------------------------------------|-----------------------------------|
|             | Liver                                   | Kidney                         | Liver                                                               | Kidney                          | Liver                                                    | Kidney                          | Liver                                                 | Kidney                            |
| Group i     | 99.4 ( $\pm$ 0.5)                       | 99.2 ( $\pm$ 0.3)              | 4.41 ( $\pm$ 1.28)                                                  | 0.19 ( $\pm$ 0.10)              | 2.08 ( $\pm$ 0.44)                                       | 7.25 ( $\pm$ 0.62)              | 0.288 ( $\pm$ 0.100)                                  | 0.025 ( $\pm$ 0.009)              |
| Group ii    | 99.9 ( $\pm$ 0.6) <sup>a</sup>          | 95.9 ( $\pm$ 2.1) <sup>d</sup> | 4.65 ( $\pm$ 0.79)                                                  | 0.11 ( $\pm$ 0.07) <sup>f</sup> | 0.35 ( $\pm$ 0.59) <sup>h</sup>                          | 7.01 ( $\pm$ 1.14)              | 0.386 ( $\pm$ 0.166)                                  | 0.049 ( $\pm$ 0.021) <sup>k</sup> |
| Group iii   | 98.5 ( $\pm$ 0.5) <sup>b</sup>          | 98.0 ( $\pm$ 0.7)              | 3.99 ( $\pm$ 0.74)                                                  | 0.21 ( $\pm$ 0.08)              | 2.78 ( $\pm$ 0.16)                                       | 8.13 ( $\pm$ 1.06)              | 0.332 ( $\pm$ 0.058)                                  | 0.035 ( $\pm$ 0.012)              |
| Group iv    | 99.0 ( $\pm$ 0.6)                       | 97.8 ( $\pm$ 2.2)              | 3.67 ( $\pm$ 1.12)                                                  | 0.09 ( $\pm$ 0.86) <sup>g</sup> | 1.54 ( $\pm$ 1.62)                                       | 8.77 ( $\pm$ 1.80) <sup>i</sup> | 0.341 ( $\pm$ 0.120)                                  | 0.032 ( $\pm$ 0.013)              |
| Group v     | 99.9 ( $\pm$ 0.3) <sup>c</sup>          | 97.0 ( $\pm$ 1.3) <sup>e</sup> | 3.60 ( $\pm$ 1.39)                                                  | 0.11 ( $\pm$ 0.04)              | 2.63 ( $\pm$ 0.79)                                       | 8.96 ( $\pm$ 1.38) <sup>j</sup> | 0.322 ( $\pm$ 0.054)                                  | 0.014 ( $\pm$ 0.001)              |

162 <sup>a</sup>  $p = 0.0252$  between group i and group ii.

163 <sup>b</sup>  $p = 0.0025$  between group i and group iii.

164 <sup>c</sup>  $p = 0.0444$  between group i and group v.

165 <sup>d</sup>  $p = 0.0008$  between group i and group ii.

166 <sup>e</sup>  $p = 0.0234$  between group i and group v.

167 <sup>f</sup>  $p = 0.0375$  between group i and group ii.

168 <sup>g</sup>  $p = 0.0353$  between group i and group iv.

169 <sup>h</sup>  $p = 0.0018$  between group i and group ii.

170 <sup>i</sup>  $p = 0.0177$  between group i and group iv.

171 <sup>j</sup>  $p = 0.0107$  between group i and group v.

172 <sup>k</sup>  $p = 0.0023$  between group i and group ii.

173

174

175

176 **S6. Ammonia assay and calculation of the theoretical amount of total ammonia administered to mice**

177 The assay was performed according to the manufacturer's protocol. Ammonia assay reagent containing  $\alpha$ -ketoglutaric acid and NADPH was prepared and  
178 1.0 mL of it was added to each cuvette. Reagent blank and standard cuvettes contained 100  $\mu$ L of water and ammonia standard solution (10  $\mu$ g mL<sup>-1</sup>),  
179 respectively, while sample cuvette contained 100  $\mu$ L of test solution (e.g., CU and mouse serum). All the contents in a cuvette were mixed and incubated at  
180 room temperature for 5 min, and absorbance ( $A_{Initial}$ ) was measured at 340 nm. Next, 10  $\mu$ L of L-glutamate dehydrogenase (GDH) solution was added and  
181 incubated for another 5 min. The absorbance was measured again at 340 nm ( $A_{Final}$ ). The calculation procedures are as follows:

182 
$$\Delta A_{340} = A_{Initial} - A_{Final}$$

183 
$$\Delta(\Delta A_{340}) \text{ for test or standard} = \Delta A_{340}(\text{test or standard}) - \Delta A_{340}(\text{blank})$$

184 
$$\text{mg of NH}_3 \text{ of original sample (1 mL)} = \frac{\Delta(\Delta A_{340}) \times TV \times MW \text{ of ammonia} \times F}{\epsilon \times d \times SV \times 1000} = \frac{\Delta(\Delta A_{340}) \times TV \times F}{SV} \times 0.00273$$

185 where TV is total assay volume (mL), SV is sample volume (mL), MW of ammonia is 17 g mole<sup>-1</sup>, F is dilution factor from sample preparation,  $\epsilon$  is millimolar  
186 extinction coefficient (mM<sup>-1</sup> cm<sup>-1</sup>) for NADPH at 340 nm, and d is pathlength (cm).

187 The concentration of ammonia in CU that had been freshly prepared using the heating method was found to range in 42.8–244.4  $\mu$ g mL<sup>-1</sup>. As displayed in  
188 Table S5, group ii mice received CU at a dose of 1.5 g kg<sup>-1</sup> by administering 70.4  $\mu$ L of two-fold diluted CU (CU:water, 1:1 v/v). Thus, the volume of CU

189 directly administered to mice is  $70.4 \mu\text{L} \times \frac{1}{2}$ . By applying the average weight of mice (28 g), the theoretical amount of total ammonia administered to mice

190 can be calculated as follows:

191 for 42.8  $\mu\text{g mL}^{-1}$  of ammonia in CU (1:2),

192 
$$(42.8 \mu\text{g mL}^{-1} \times 10^{-3} \text{mg } \mu\text{g}^{-1}) \times \left(70.4 \mu\text{L} \times \frac{1}{2} \times 10^{-3} \text{mL } \mu\text{L}^{-1}\right) \div (28 \text{g} \times 10^{-3} \text{kg } \text{g}^{-1}) = 0.054 \text{mg kg}^{-1}$$

193 and

194 for 244.4  $\mu\text{g mL}^{-1}$  of ammonia in CU (1:2),

195 
$$(244.4 \mu\text{g mL}^{-1} \times 10^{-3} \text{mg } \mu\text{g}^{-1}) \times \left(70.4 \mu\text{L} \times \frac{1}{2} \times 10^{-3} \text{mL } \mu\text{L}^{-1}\right) \div (28 \text{g} \times 10^{-3} \text{kg } \text{g}^{-1}) = 0.307 \text{mg kg}^{-1}$$

196 **S7. OPLS-DA results**

197 **Fig. S1.** OPLS-DA score plots for pair-wise comparisons of the CU (1:2)-treated group with the other  
198 groups. (a) Serum, (b, d) kidney, and (c, e) liver samples were analyzed by GC-MS (a, b, c) and LC-  
199 MS/MS (d, e). Group identification: CON, group i (treated with saline); CU, group ii (treated with CU  
200 (1:2)); CU (aq), group iii (treated with CU (1:2) (aq)); ChCl, group iv (treated with ChCl); Urea,  
201 group v (treated with urea). Detailed information on the doses is provided in Table S5.

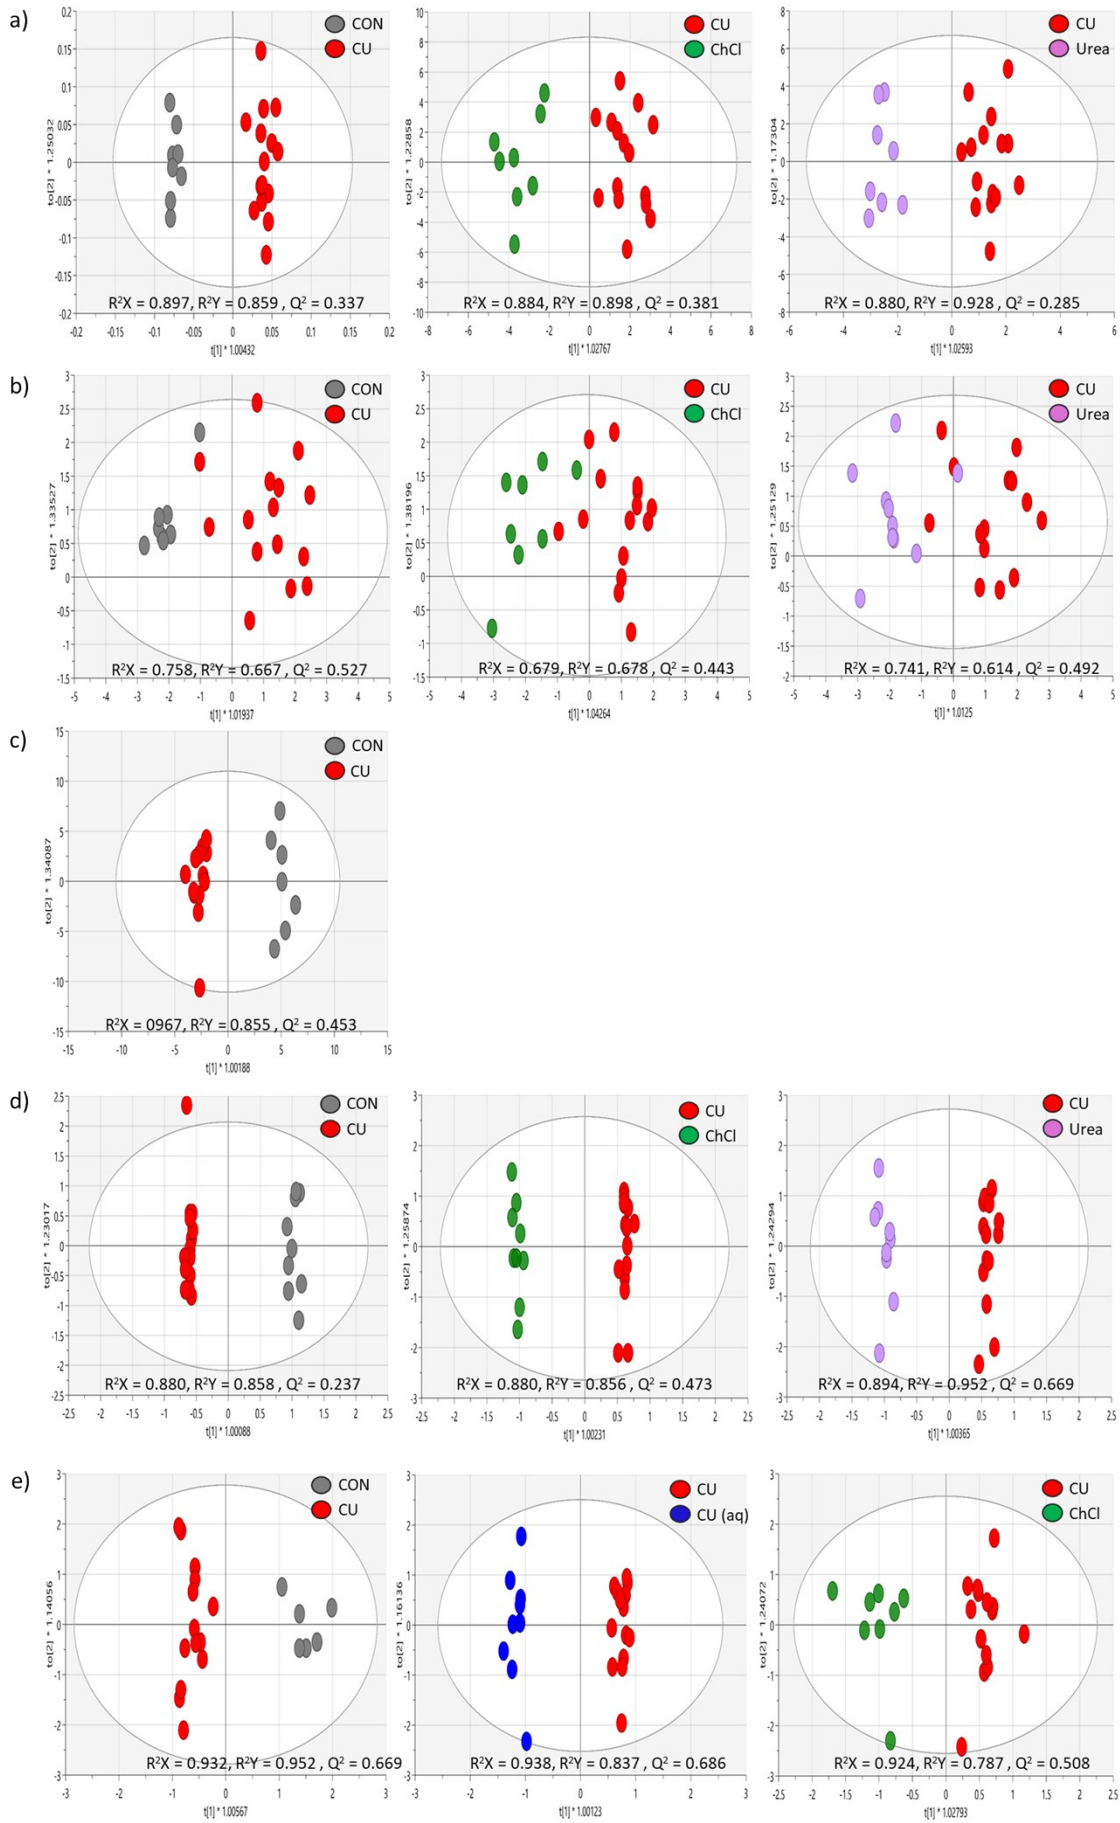

Supplement: d0gc03927f1.pdf [file d0gc03927f1.pdf]
